# Supplementary material for: Intakes of Added Sugars, with a Focus on Beverages and the Associations with Micronutrient Adequacy in US Children, Adolescents, and Teens (NHANES 2003–2018)
Source: MDPI journal article supplement (doi:10.3390/nu15153285), 2023-07-25
Supplement: s1 [file s1]

Intakes of added sugars with a focus on beverages and the associations with micronutrient adequacy in US children, adolescents and teens (NHANES 2003-2018), Ricciuto, L., et al.

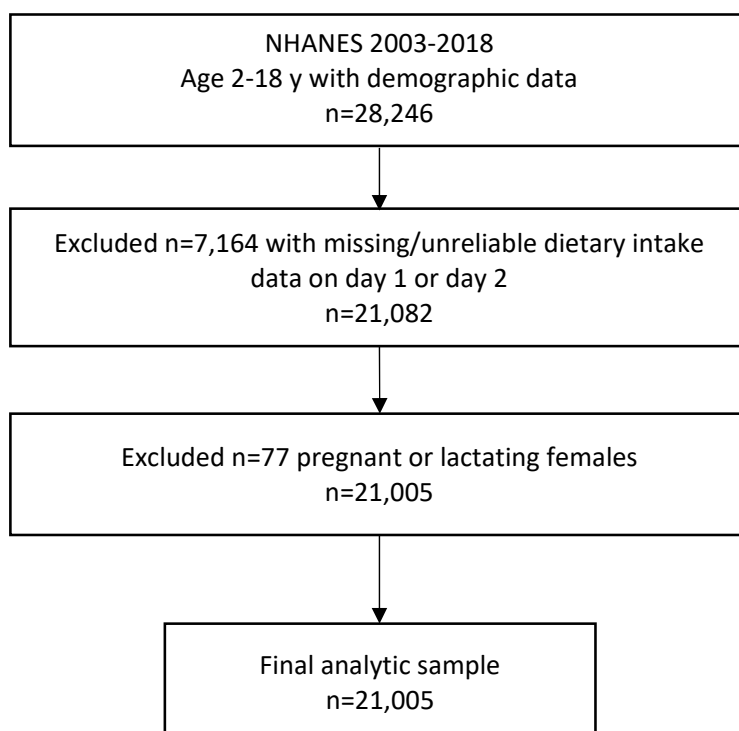

**Supplemental Figure S1.** NHANES 2003-2018 analytic sample flow chart.

Intakes of added sugars with a focus on beverages and the associations with micronutrient adequacy in US children, adolescents and teens (NHANES 2003-2018), Ricciuto, L., et al.

**Supplemental Table S1.** Percent of children, adolescents and teens (2-18 y) reporting intake (consumers) of beverage sources of added sugars from the pooled sample (NHANES 2003-2018, n=21,005).

| Food Group         | Sweetened Beverages |        | Soft Drinks  |        | Fruit Drinks |        | Sport and Energy Drinks |        | Coffee and Tea |      | Flavored Milk |        |
|--------------------|---------------------|--------|--------------|--------|--------------|--------|-------------------------|--------|----------------|------|---------------|--------|
| 2-8 y (n=8,599)    |                     |        |              |        |              |        |                         |        |                |      |               |        |
| Year               | Mean ± SE           | P      | Mean ± SE    | P      | Mean ± SE    | P      | Mean ± SE               | P      | Mean ± SE      | P    | Mean ± SE     | P      |
| 2003-04            | 82.16 ± 1.82        |        | 55.23 ± 2.52 |        | 57.93 ± 2.62 |        | 0.12 ± 0.08             |        | 12.98 ± 3.06   |      | 35.27 ± 1.99  |        |
| 2005-06            | 73.16 ± 2.02        | <0.01* | 42.04 ± 1.76 | <0.01* | 51.36 ± 2.79 | 0.09   | 8.83 ± 2.11             | <0.01* | 6.85 ± 1.30    | 0.07 | 30.81 ± 2.53  | 0.17   |
| 2007-08            | 75.21 ± 1.79        | 0.01   | 42.15 ± 2.89 | <0.01* | 54.00 ± 2.19 | 0.25   | 6.34 ± 2.04             | <0.01* | 12.16 ± 2.68   | 0.84 | 35.35 ± 2.75  | 0.98   |
| 2009-10            | 67.97 ± 1.93        | <0.01* | 33.69 ± 3.08 | <0.01* | 48.51 ± 1.94 | <0.01* | 6.04 ± 1.51             | <0.01* | 8.31 ± 1.23    | 0.16 | 36.18 ± 1.92  | 0.74   |
| 2011-12            | 71.28 ± 3.26        | <0.01* | 38.09 ± 4.17 | <0.01* | 50.60 ± 2.43 | 0.04   | 7.38 ± 1.31             | <0.01* | 10.18 ± 1.33   | 0.40 | 34.77 ± 3.56  | 0.90   |
| 2013-14            | 58.42 ± 3.26        | <0.01* | 25.45 ± 2.65 | <0.01* | 42.95 ± 3.39 | <0.01* | 9.12 ± 1.82             | <0.01* | 9.15 ± 1.93    | 0.29 | 29.77 ± 1.50  | 0.03   |
| 2015-16            | 59.59 ± 2.85        | <0.01* | 25.11 ± 2.50 | <0.01* | 43.02 ± 1.67 | <0.01* | 6.51 ± 0.92             | <0.01* | 8.39 ± 1.97    | 0.21 | 26.57 ± 1.83  | <0.01* |
| 2017-18            | 60.66 ± 2.97        | <0.01* | 28.17 ± 2.32 | <0.01* | 37.91 ± 3.15 | <0.01* | 9.12 ± 1.31             | <0.01* | 10.89 ± 2.28   | 0.58 | 32.29 ± 2.99  | 0.41   |
| Trend <sup>1</sup> | Beta ± SE           | P      | Beta ± SE    | P      | Beta ± SE    | P      | Beta ± SE               | P      | Beta ± SE      | P    | Beta ± SE     | P      |
|                    | -3.15 ± 0.39        | <0.01  | -3.80 ± 0.38 | <0.01  | -2.53 ± 0.42 | <0.01  | 0.72 ± 0.20             | <0.01  | -0.17 ± 0.37   | 0.65 | -0.73 ± 0.37  | 0.05   |
| 9-18 y (n=12,406)  |                     |        |              |        |              |        |                         |        |                |      |               |        |
| Year               | Mean ± SE           | P      | Mean ± SE    | P      | Mean ± SE    | P      | Mean ± SE               | P      | Mean ± SE      | P    | Mean ± SE     | P      |
| 2003-04            | 89.91 ± 1.28        |        | 74.99 ± 2.34 |        | 50.94 ± 2.14 |        | 0.27 ± 0.13             |        | 16.39 ± 2.16   |      | 20.36 ± 1.58  |        |
| 2005-06            | 83.99 ± 2.13        | 0.02   | 68.05 ± 2.26 | 0.03   | 40.08 ± 2.21 | <0.01* | 15.13 ± 1.69            | <0.01* | 13.27 ± 1.60   | 0.25 | 19.76 ± 1.84  | 0.81   |
| 2007-08            | 80.01 ± 1.94        | <0.01* | 60.50 ± 2.64 | <0.01* | 39.15 ± 1.95 | <0.01* | 14.21 ± 1.87            | <0.01* | 19.03 ± 2.62   | 0.44 | 22.78 ± 3.05  | 0.48   |
| 2009-10            | 78.71 ± 1.73        | <0.01* | 58.80 ± 2.21 | <0.01* | 40.23 ± 3.14 | 0.01   | 14.06 ± 2.13            | <0.01* | 15.77 ± 2.51   | 0.85 | 28.59 ± 2.72  | 0.01   |
| 2011-12            | 82.78 ± 2.24        | 0.01   | 57.16 ± 2.52 | <0.01* | 42.98 ± 2.05 | 0.01   | 15.60 ± 1.52            | <0.01* | 19.89 ± 1.95   | 0.23 | 22.33 ± 2.41  | 0.50   |
| 2013-14            | 73.95 ± 1.48        | <0.01* | 51.21 ± 1.60 | <0.01* | 37.46 ± 1.98 | <0.01* | 14.76 ± 1.59            | <0.01* | 18.66 ± 1.56   | 0.40 | 22.22 ± 1.97  | 0.46   |
| 2015-16            | 72.71 ± 2.11        | <0.01* | 50.61 ± 2.43 | <0.01* | 32.31 ± 1.64 | <0.01* | 11.43 ± 1.47            | <0.01* | 16.58 ± 2.58   | 0.96 | 23.46 ± 2.82  | 0.34   |
| 2017-18            | 71.57 ± 2.04        | <0.01* | 45.13 ± 2.39 | <0.01* | 33.88 ± 2.33 | <0.01* | 12.52 ± 1.20            | <0.01* | 20.72 ± 1.72   | 0.12 | 19.87 ± 2.35  | 0.86   |
| Trend <sup>1</sup> | Beta ± SE           | P      | Beta ± SE    | P      | Beta ± SE    | P      | Beta ± SE               | P      | Beta ± SE      | P    | Beta ± SE     | P      |
|                    | -2.37 ± 0.28        | <0.01  | -3.87 ± 0.36 | <0.01  | -1.91 ± 0.32 | <0.01  | 0.82 ± 0.20             | <0.01  | 0.59 ± 0.31    | 0.06 | 0.08 ± 0.34   | 0.82   |
| 2-18 y (n=21,005)  |                     |        |              |        |              |        |                         |        |                |      |               |        |
| Year               | Mean ± SE           | P      | Mean ± SE    | P      | Mean ± SE    | P      | Mean ± SE               | P      | Mean ± SE      | P    | Mean ± SE     | P      |
| 2003-04            | 86.83 ± 0.95        |        | 67.13 ± 1.81 |        | 53.72 ± 1.67 |        | 0.21 ± 0.07             |        | 15.04 ± 1.67   |      | 26.29 ± 1.25  |        |
| 2005-06            | 79.69 ± 1.55        | <0.01* | 57.73 ± 1.52 | <0.01* | 44.55 ± 1.98 | <0.01* | 12.63 ± 1.59            | <0.01* | 10.72 ± 0.97   | 0.03 | 24.14 ± 1.73  | 0.32   |
| 2007-08            | 78.10 ± 1.35        | <0.01* | 53.18 ± 2.04 | <0.01* | 45.07 ± 1.66 | <0.01* | 11.07 ± 1.24            | <0.01* | 16.29 ± 2.15   | 0.65 | 27.79 ± 2.41  | 0.58   |
| 2009-10            | 74.37 ± 1.71        | <0.01* | 48.67 ± 2.31 | <0.01* | 43.57 ± 2.31 | <0.01* | 10.82 ± 1.52            | <0.01* | 12.76 ± 1.90   | 0.37 | 31.65 ± 2.04  | 0.03   |
| 2011-12            | 77.93 ± 2.31        | <0.01* | 49.13 ± 2.88 | <0.01* | 46.19 ± 1.68 | <0.01* | 12.14 ± 1.24            | <0.01* | 15.80 ± 1.03   | 0.70 | 27.57 ± 2.63  | 0.66   |
| 2013-14            | 67.84 ± 1.55        | <0.01* | 41.07 ± 1.87 | <0.01* | 39.62 ± 1.86 | <0.01* | 12.54 ± 1.35            | <0.01* | 14.91 ± 1.41   | 0.96 | 25.20 ± 1.49  | 0.57   |
| 2015-16            | 67.42 ± 2.04        | <0.01* | 40.33 ± 2.34 | <0.01* | 36.63 ± 1.37 | <0.01* | 9.45 ± 0.80             | <0.01* | 13.28 ± 2.29   | 0.54 | 24.71 ± 2.07  | 0.52   |
| 2017-18            | 67.31 ± 2.10        | <0.01* | 38.50 ± 1.98 | <0.01* | 35.45 ± 2.04 | <0.01* | 11.19 ± 0.74            | <0.01* | 16.88 ± 1.85   | 0.46 | 24.73 ± 1.82  | 0.48   |
| Trend <sup>1</sup> | Beta ± SE           | P      | Beta ± SE    | P      | Beta ± SE    | P      | Beta ± SE               | P      | Beta ± SE      | P    | Beta ± SE     | P      |
|                    | -2.68 ± 0.26        | <0.01  | -3.84 ± 0.30 | <0.01  | -2.16 ± 0.28 | <0.01  | 0.78 ± 0.15             | <0.01  | 0.29 ± 0.27    | 0.29 | -0.24 ± 0.27  | 0.36   |

\*Significantly different from reference cycle (2003-04), p<0.01

<sup>1</sup>Linear trend across all cycles, statistically significant at p<0.01

Intakes of added sugars with a focus on beverages and the associations with micronutrient adequacy in US children, adolescents and teens (NHANES 2003-2018), Ricciuto, L., et al.

**Supplemental Table S2.** Trends in added sugars intake (% kcal) from beverage sources and the rest of the diet among all children, adolescents and teens and consumers only from the pooled sample (NHANES 2003-2018, n=21,005).

| Food Group                | Sweetened Beverages |        | Soft Drinks  |        | Fruit Drinks |        | Sport and Energy Drinks |        | Coffee and Tea |        | Flavored Milk |      | Rest of the Diet |      |
|---------------------------|---------------------|--------|--------------|--------|--------------|--------|-------------------------|--------|----------------|--------|---------------|------|------------------|------|
| All Individuals<br>2-8 y  |                     |        |              |        |              |        |                         |        |                |        |               |      |                  |      |
| Year                      | Mean ± SE           | P      | Mean ± SE    | P      | Mean ± SE    | P      | Mean ± SE               | P      | Mean ± SE      | P      | Mean ± SE     | P    | Mean ± SE        | P    |
| 2003-04                   | 5.30 ± 0.26         |        | 2.55 ± 0.22  |        | 2.73 ± 0.18  |        | 0.004 ± 0.003           |        | 0.38 ± 0.13    |        | 0.84 ± 0.09   |      | 8.95 ± 0.26      |      |
| 2005-06                   | 4.23 ± 0.20         | <0.01* | 1.66 ± 0.13  | <0.01* | 2.24 ± 0.14  | 0.03   | 0.29 ± 0.10             | 0.01   | 0.14 ± 0.03    | 0.07   | 0.74 ± 0.08   | 0.36 | 9.78 ± 0.27      | 0.03 |
| 2007-08                   | 4.51 ± 0.21         | 0.02   | 1.71 ± 0.19  | <0.01* | 2.67 ± 0.15  | 0.78   | 0.12 ± 0.03             | <0.01* | 0.29 ± 0.08    | 0.58   | 0.94 ± 0.11   | 0.50 | 9.27 ± 0.21      | 0.34 |
| 2009-10                   | 3.68 ± 0.15         | <0.01* | 1.23 ± 0.12  | <0.01* | 2.27 ± 0.15  | 0.05   | 0.16 ± 0.05             | <0.01* | 0.28 ± 0.03    | 0.48   | 0.98 ± 0.08   | 0.27 | 8.53 ± 0.23      | 0.23 |
| 2011-12                   | 3.73 ± 0.25         | <0.01* | 1.44 ± 0.22  | <0.01* | 2.10 ± 0.14  | 0.01   | 0.19 ± 0.05             | <0.01* | 0.28 ± 0.05    | 0.50   | 0.88 ± 0.16   | 0.85 | 9.02 ± 0.28      | 0.85 |
| 2013-14                   | 2.97 ± 0.27         | <0.01* | 0.95 ± 0.10  | <0.01* | 1.71 ± 0.23  | <0.01* | 0.28 ± 0.08             | <0.01* | 0.34 ± 0.11    | 0.80   | 0.68 ± 0.06   | 0.12 | 9.26 ± 0.35      | 0.48 |
| 2015-16                   | 2.82 ± 0.19         | <0.01* | 0.98 ± 0.11  | <0.01* | 1.62 ± 0.10  | <0.01* | 0.19 ± 0.05             | <0.01* | 0.23 ± 0.06    | 0.31   | 0.61 ± 0.06   | 0.03 | 8.57 ± 0.25      | 0.29 |
| 2017-18                   | 2.58 ± 0.22         | <0.01* | 0.99 ± 0.17  | <0.01* | 1.31 ± 0.12  | <0.01* | 0.23 ± 0.05             | <0.01* | 0.38 ± 0.12    | 1.00   | 0.81 ± 0.11   | 0.78 | 8.79 ± 0.30      | 0.69 |
| Trend <sup>1</sup>        | Beta ± SE           | P      | Beta ± SE    | P      | Beta ± SE    | P      | Beta ± SE               | P      | Beta ± SE      | P      | Beta ± SE     | P    | Beta ± SE        | P    |
|                           | -0.37 ± 0.04        | <0.01  | -0.19 ± 0.03 | <0.01  | -0.19 ± 0.02 | <0.01  | 0.02 ± 0.01             | 0.02   | 0.01 ± 0.02    | 0.66   | -0.02 ± 0.01  | 0.13 | -0.08 ± 0.04     | 0.06 |
| All Individuals<br>9-18 y |                     |        |              |        |              |        |                         |        |                |        |               |      |                  |      |
| Year                      | Mean ± SE           | P      | Mean ± SE    | P      | Mean ± SE    | P      | Mean ± SE               | P      | Mean ± SE      | P      | Mean ± SE     | P    | Mean ± SE        | P    |
| 2003-04                   | 9.18 ± 0.43         |        | 6.54 ± 0.33  |        | 2.62 ± 0.23  |        | 0.01 ± 0.003            |        | 0.53 ± 0.08    |        | 0.39 ± 0.04   |      | 8.46 ± 0.21      |      |
| 2005-06                   | 7.93 ± 0.46         | 0.05   | 5.42 ± 0.33  | 0.02   | 1.86 ± 0.13  | 0.01   | 0.62 ± 0.08             | <0.01* | 0.38 ± 0.06    | 0.13   | 0.41 ± 0.04   | 0.77 | 8.48 ± 0.18      | 0.95 |
| 2007-08                   | 7.56 ± 0.50         | 0.01   | 4.92 ± 0.51  | 0.01   | 2.04 ± 0.09  | 0.02   | 0.58 ± 0.09             | <0.01* | 0.67 ± 0.12    | 0.37   | 0.40 ± 0.05   | 0.93 | 8.65 ± 0.23      | 0.54 |
| 2009-10                   | 6.67 ± 0.36         | <0.01* | 4.09 ± 0.21  | <0.01* | 2.05 ± 0.22  | 0.07   | 0.50 ± 0.10             | <0.01* | 0.64 ± 0.11    | 0.44   | 0.63 ± 0.08   | 0.01 | 8.37 ± 0.27      | 0.79 |
| 2011-12                   | 6.38 ± 0.21         | <0.01* | 3.76 ± 0.21  | <0.01* | 1.98 ± 0.15  | 0.02   | 0.64 ± 0.07             | <0.01* | 1.23 ± 0.18    | <0.01* | 0.41 ± 0.05   | 0.72 | 7.83 ± 0.24      | 0.05 |
| 2013-14                   | 5.86 ± 0.27         | <0.01* | 3.60 ± 0.23  | <0.01* | 1.43 ± 0.12  | <0.01* | 0.80 ± 0.21             | <0.01* | 1.14 ± 0.29    | 0.04   | 0.40 ± 0.05   | 0.96 | 7.78 ± 0.21      | 0.02 |
| 2015-16                   | 4.78 ± 0.26         | <0.01* | 3.06 ± 0.20  | <0.01* | 1.26 ± 0.10  | <0.01* | 0.41 ± 0.07             | <0.01* | 0.86 ± 0.14    | 0.04   | 0.42 ± 0.06   | 0.67 | 7.83 ± 0.22      | 0.04 |
| 2017-18                   | 4.67 ± 0.30         | <0.01* | 2.76 ± 0.28  | <0.01* | 1.33 ± 0.14  | <0.01* | 0.49 ± 0.05             | <0.01* | 0.94 ± 0.09    | <0.01* | 0.35 ± 0.04   | 0.42 | 8.40 ± 0.26      | 0.84 |
| Trend <sup>1</sup>        | Beta ± SE           | P      | Beta ± SE    | P      | Beta ± SE    | P      | Beta ± SE               | P      | Beta ± SE      | P      | Beta ± SE     | P    | Beta ± SE        | P    |
|                           | -0.63 ± 0.06        | <0.01  | -0.51 ± 0.05 | <0.01  | -0.17 ± 0.03 | <0.01  | 0.04 ± 0.01             | <0.01  | 0.09 ± 0.02    | <0.01  | -0.01 ± 0.01  | 0.42 | -0.08 ± 0.03     | 0.02 |
| All Individuals<br>2-18 y |                     |        |              |        |              |        |                         |        |                |        |               |      |                  |      |
| Year                      | Mean ± SE           | P      | Mean ± SE    | P      | Mean ± SE    | P      | Mean ± SE               | P      | Mean ± SE      | P      | Mean ± SE     | P    | Mean ± SE        | P    |
| 2003-04                   | 7.64 ± 0.31         |        | 4.95 ± 0.25  |        | 2.67 ± 0.15  |        | 0.01 ± 0.002            |        | 0.47 ± 0.07    |        | 0.57 ± 0.04   |      | 8.65 ± 0.13      |      |
| 2005-06                   | 6.46 ± 0.29         | 0.01   | 3.93 ± 0.21  | <0.01* | 2.01 ± 0.10  | <0.01* | 0.49 ± 0.08             | <0.01* | 0.29 ± 0.03    | 0.02   | 0.54 ± 0.05   | 0.61 | 9.00 ± 0.16      | 0.10 |

Intakes of added sugars with a focus on beverages and the associations with micronutrient adequacy in US children, adolescents and teens (NHANES 2003-2018), Ricciuto, L., et al.

|                          |              |        |              |        |              |        |              |        |             |        |              |        |              |      |
|--------------------------|--------------|--------|--------------|--------|--------------|--------|--------------|--------|-------------|--------|--------------|--------|--------------|------|
| 2007-08                  | 6.34 ± 0.33  | 0.01   | 3.64 ± 0.34  | <0.01* | 2.29 ± 0.07  | 0.03   | 0.39 ± 0.06  | <0.01* | 0.52 ± 0.09 | 0.68   | 0.62 ± 0.06  | 0.58   | 8.90 ± 0.14  | 0.21 |
| 2009-10                  | 5.46 ± 0.26  | <0.01* | 2.94 ± 0.16  | <0.01* | 2.14 ± 0.17  | 0.02   | 0.37 ± 0.07  | <0.01* | 0.50 ± 0.07 | 0.81   | 0.77 ± 0.05  | <0.01* | 8.43 ± 0.18  | 0.32 |
| 2011-12                  | 5.27 ± 0.18  | <0.01* | 2.78 ± 0.19  | <0.01* | 2.03 ± 0.11  | <0.01* | 0.45 ± 0.05  | <0.01* | 0.83 ± 0.11 | 0.01   | 0.61 ± 0.09  | 0.70   | 8.33 ± 0.22  | 0.20 |
| 2013-14                  | 4.72 ± 0.23  | <0.01* | 2.55 ± 0.18  | <0.01* | 1.54 ± 0.12  | <0.01* | 0.60 ± 0.14  | <0.01* | 0.82 ± 0.20 | 0.10   | 0.51 ± 0.04  | 0.28   | 8.36 ± 0.25  | 0.30 |
| 2015-16                  | 3.99 ± 0.20  | <0.01* | 2.22 ± 0.15  | <0.01* | 1.40 ± 0.07  | <0.01* | 0.32 ± 0.06  | <0.01* | 0.61 ± 0.10 | 0.28   | 0.50 ± 0.05  | 0.24   | 8.13 ± 0.20  | 0.03 |
| 2017-18                  | 3.85 ± 0.21  | <0.01* | 2.07 ± 0.21  | <0.01* | 1.32 ± 0.11  | <0.01* | 0.39 ± 0.03  | <0.01* | 0.72 ± 0.10 | 0.04   | 0.53 ± 0.06  | 0.53   | 8.55 ± 0.22  | 0.68 |
| Trend <sup>1</sup>       | Beta ± SE    | P      | Beta ± SE   | P      | Beta ± SE    | P      | Beta ± SE    | P    |
|                          | -0.52 ± 0.04 | <0.01  | -0.38 ± 0.03 | <0.01  | -0.18 ± 0.02 | <0.01  | 0.03 ± 0.01  | <0.01  | 0.05 ± 0.01 | <0.01  | -0.01 ± 0.01 | 0.12   | -0.08 ± 0.03 | 0.01 |
| Consumers Only<br>2-8 y  |              |        |              |        |              |        |              |        |             |        |              |        |              |      |
| Year                     | Mean ± SE    | P      | Mean ± SE   | P      | Mean ± SE    | P      | Mean ± SE    | P    |
| 2003-04                  | 6.45 ± 0.33  |        | 4.61 ± 0.27  |        | 4.72 ± 0.28  |        | 3.79 ± 0.40  |        | 2.90 ± 0.65 |        | 2.40 ± 0.19  |        | 8.95 ± 0.26  |      |
| 2005-06                  | 5.79 ± 0.21  | 0.10   | 3.94 ± 0.23  | 0.06   | 4.37 ± 0.19  | 0.30   | 3.29 ± 0.55  | 0.47   | 2.01 ± 0.26 | 0.21   | 2.39 ± 0.15  | 0.98   | 9.78 ± 0.27  | 0.03 |
| 2007-08                  | 6.00 ± 0.20  | 0.25   | 4.05 ± 0.30  | 0.17   | 4.94 ± 0.25  | 0.56   | 1.86 ± 0.35  | <0.01* | 2.41 ± 0.30 | 0.50   | 2.66 ± 0.20  | 0.35   | 9.28 ± 0.21  | 0.33 |
| 2009-10                  | 5.42 ± 0.18  | 0.01   | 3.66 ± 0.21  | 0.01   | 4.68 ± 0.18  | 0.90   | 2.67 ± 0.36  | 0.04   | 3.42 ± 0.29 | 0.47   | 2.70 ± 0.16  | 0.23   | 8.53 ± 0.23  | 0.24 |
| 2011-12                  | 5.24 ± 0.35  | 0.01   | 3.79 ± 0.40  | 0.09   | 4.14 ± 0.27  | 0.14   | 2.53 ± 0.36  | 0.02   | 2.80 ± 0.39 | 0.90   | 2.53 ± 0.26  | 0.68   | 9.02 ± 0.28  | 0.85 |
| 2013-14                  | 5.08 ± 0.28  | <0.01* | 3.72 ± 0.26  | 0.02   | 3.97 ± 0.26  | 0.05   | 3.12 ± 0.57  | 0.34   | 3.66 ± 0.67 | 0.42   | 2.29 ± 0.17  | 0.70   | 9.26 ± 0.35  | 0.48 |
| 2015-16                  | 4.72 ± 0.15  | <0.01* | 3.91 ± 0.25  | 0.06   | 3.75 ± 0.17  | <0.01* | 2.96 ± 0.72  | 0.32   | 2.78 ± 0.28 | 0.87   | 2.31 ± 0.22  | 0.76   | 8.57 ± 0.25  | 0.30 |
| 2017-18                  | 4.25 ± 0.29  | <0.01* | 3.52 ± 0.40  | 0.03   | 3.45 ± 0.20  | <0.01* | 2.55 ± 0.29  | 0.01   | 3.45 ± 0.51 | 0.51   | 2.49 ± 0.18  | 0.71   | 8.79 ± 0.30  | 0.69 |
| Trend <sup>1</sup>       | Beta ± SE    | P      | Beta ± SE   | P      | Beta ± SE    | P      | Beta ± SE    | P    |
|                          | -0.28 ± 0.04 | <0.01  | -0.12 ± 0.05 | 0.02   | -0.18 ± 0.04 | <0.01  | -0.01 ± 0.10 | 0.93   | 0.11 ± 0.09 | 0.20   | -0.01 ± 0.03 | 0.72   | -0.08 ± 0.04 | 0.06 |
| Consumers Only<br>9-18 y |              |        |              |        |              |        |              |        |             |        |              |        |              |      |
| Year                     | Mean ± SE    | P      | Mean ± SE   | P      | Mean ± SE    | P      | Mean ± SE    | P    |
| 2003-04                  | 10.21 ± 0.42 |        | 8.73 ± 0.33  |        | 5.15 ± 0.33  |        | 2.13 ± 0.69  |        | 3.26 ± 0.24 |        | 1.93 ± 0.08  |        | 8.46 ± 0.21  |      |
| 2005-06                  | 9.44 ± 0.40  | 0.18   | 7.97 ± 0.34  | 0.11   | 4.65 ± 0.16  | 0.18   | 4.12 ± 0.22  | 0.01   | 2.90 ± 0.14 | 0.19   | 2.07 ± 0.16  | 0.43   | 8.48 ± 0.18  | 0.95 |
| 2007-08                  | 9.45 ± 0.51  | 0.25   | 8.13 ± 0.63  | 0.40   | 5.20 ± 0.17  | 0.88   | 4.06 ± 0.42  | 0.02   | 3.51 ± 0.33 | 0.54   | 1.75 ± 0.11  | 0.20   | 8.65 ± 0.23  | 0.54 |
| 2009-10                  | 8.47 ± 0.42  | <0.01* | 6.96 ± 0.29  | <0.01* | 5.09 ± 0.29  | 0.90   | 3.59 ± 0.29  | 0.06   | 4.05 ± 0.31 | 0.05   | 2.22 ± 0.14  | 0.08   | 8.38 ± 0.27  | 0.80 |
| 2011-12                  | 7.71 ± 0.27  | <0.01* | 6.58 ± 0.26  | <0.01* | 4.60 ± 0.35  | 0.25   | 4.08 ± 0.27  | 0.01   | 6.20 ± 0.58 | <0.01* | 1.86 ± 0.09  | 0.53   | 7.83 ± 0.24  | 0.05 |
| 2013-14                  | 7.92 ± 0.35  | <0.01* | 7.02 ± 0.36  | <0.01* | 3.82 ± 0.18  | <0.01* | 5.42 ± 1.22  | 0.02   | 6.13 ± 1.70 | 0.10   | 1.79 ± 0.15  | 0.39   | 7.79 ± 0.22  | 0.02 |
| 2015-16                  | 6.57 ± 0.28  | <0.01* | 6.04 ± 0.21  | <0.01* | 3.90 ± 0.25  | <0.01* | 3.59 ± 0.63  | 0.12   | 5.17 ± 0.34 | <0.01* | 1.81 ± 0.12  | 0.38   | 7.86 ± 0.23  | 0.05 |
| 2017-18                  | 6.52 ± 0.38  | <0.01* | 6.13 ± 0.43  | <0.01* | 3.94 ± 0.32  | 0.01   | 3.89 ± 0.41  | 0.03   | 4.53 ± 0.37 | <0.01* | 1.77 ± 0.19  | 0.41   | 8.42 ± 0.26  | 0.90 |
| Trend <sup>1</sup>       | Beta ± SE    | P      | Beta ± SE   | P      | Beta ± SE    | P      | Beta ± SE    | P    |
|                          | -0.54 ± 0.06 | <0.01  | -0.38 ± 0.06 | <0.01  | -0.20 ± 0.05 | <0.01  | 0.02 ± 0.09  | 0.79   | 0.33 ± 0.07 | <0.01  | -0.03 ± 0.02 | 0.13   | -0.08 ± 0.03 | 0.03 |
| Consumers Only           |              |        |              |        |              |        |              |        |             |        |              |        |              |      |

Intakes of added sugars with a focus on beverages and the associations with micronutrient adequacy in US children, adolescents and teens (NHANES 2003-2018), Ricciuto, L., et al.

| 2-18 y             |              |        |              |        |              |        |              |      |             |        |              |      |              |      |
|--------------------|--------------|--------|--------------|--------|--------------|--------|--------------|------|-------------|--------|--------------|------|--------------|------|
| Year               | Mean ± SE    | P      | Mean ± SE    | P      | Mean ± SE    | P      | Mean ± SE    | P    | Mean ± SE   | P      | Mean ± SE    | P    | Mean ± SE    | P    |
| 2003-04            | 8.79 ± 0.34  |        | 7.38 ± 0.29  |        | 4.96 ± 0.23  |        | 2.50 ± 0.69  |      | 3.13 ± 0.32 |        | 2.18 ± 0.11  |      | 8.66 ± 0.13  |      |
| 2005-06            | 8.11 ± 0.27  | 0.12   | 6.80 ± 0.25  | 0.14   | 4.52 ± 0.13  | 0.09   | 3.89 ± 0.27  | 0.06 | 2.67 ± 0.15 | 0.19   | 2.23 ± 0.09  | 0.71 | 9.00 ± 0.16  | 0.10 |
| 2007-08            | 8.12 ± 0.35  | 0.17   | 6.84 ± 0.47  | 0.33   | 5.08 ± 0.14  | 0.68   | 3.56 ± 0.45  | 0.20 | 3.18 ± 0.24 | 0.90   | 2.21 ± 0.13  | 0.85 | 8.90 ± 0.14  | 0.20 |
| 2009-10            | 7.35 ± 0.27  | <0.01* | 6.04 ± 0.21  | <0.01* | 4.90 ± 0.18  | 0.84   | 3.38 ± 0.26  | 0.23 | 3.88 ± 0.27 | 0.07   | 2.44 ± 0.08  | 0.07 | 8.44 ± 0.18  | 0.33 |
| 2011-12            | 6.76 ± 0.26  | <0.01* | 5.67 ± 0.28  | <0.01* | 4.39 ± 0.22  | 0.07   | 3.69 ± 0.26  | 0.11 | 5.27 ± 0.53 | <0.01* | 2.21 ± 0.16  | 0.86 | 8.33 ± 0.22  | 0.20 |
| 2013-14            | 6.96 ± 0.28  | <0.01* | 6.21 ± 0.33  | 0.01*  | 3.88 ± 0.17  | <0.01* | 4.76 ± 0.89  | 0.05 | 5.53 ± 1.28 | 0.07   | 2.02 ± 0.12  | 0.34 | 8.37 ± 0.25  | 0.31 |
| 2015-16            | 5.91 ± 0.19  | <0.01* | 5.50 ± 0.19  | <0.01* | 3.83 ± 0.14  | <0.01* | 3.42 ± 0.50  | 0.28 | 4.56 ± 0.23 | <0.01* | 2.02 ± 0.10  | 0.31 | 8.14 ± 0.21  | 0.04 |
| 2017-18            | 5.72 ± 0.26  | <0.01* | 5.38 ± 0.37  | <0.01* | 3.73 ± 0.20  | <0.01* | 3.46 ± 0.28  | 0.20 | 4.26 ± 0.31 | 0.01   | 2.14 ± 0.16  | 0.83 | 8.56 ± 0.22  | 0.72 |
| Trend <sup>1</sup> | Beta ± SE    | P      | Beta ± SE    | P      | Beta ± SE    | P      | Beta ± SE    | P    | Beta ± SE   | P      | Beta ± SE    | P    | Beta ± SE    | P    |
|                    | -0.44 ± 0.05 | <0.01  | -0.28 ± 0.05 | <0.01  | -0.19 ± 0.03 | <0.01  | 0.002 ± 0.07 | 0.98 | 0.29 ± 0.06 | <0.01  | -0.03 ± 0.02 | 0.19 | -0.08 ± 0.03 | 0.01 |

\*Significantly different from reference cycle (2003-04), p<0.01

<sup>1</sup>Linear trend across all cycles, statistically significant at p<0.01



Intakes of added sugars with a focus on beverages and the associations with micronutrient adequacy in US children, adolescents and teens (NHANES 2003-2018), Ricciuto, L., et al.

|                          |                  |          |                  |          |                  |          |                  |          |                  |          |                  |          |                  |          |
|--------------------------|------------------|----------|------------------|----------|------------------|----------|------------------|----------|------------------|----------|------------------|----------|------------------|----------|
| <b>2003-04</b>           | 40.38 ± 1.59     |          | 26.21 ± 1.33     |          | 14.10 ± 0.78     |          | 0.03 ± 0.01      |          | 2.39 ± 0.32      |          | 2.95 ± 0.23      |          | 44.93 ± 0.65     |          |
| <b>2005-06</b>           | 34.31 ± 2.33     | 0.03     | 21.78 ± 1.88     | 0.06     | 9.77 ± 0.48      | <0.01*   | 2.61 ± 0.33      | <0.01*   | 1.59 ± 0.26      | 0.06     | 2.67 ± 0.30      | 0.46     | 44.72 ± 0.84     | 0.84     |
| <b>2007-08</b>           | 30.46 ± 1.51     | <0.01*   | 18.14 ± 1.66     | <0.01*   | 10.16 ± 0.34     | <0.01*   | 2.05 ± 0.30      | <0.01*   | 2.40 ± 0.45      | 0.99     | 2.82 ± 0.29      | 0.74     | 42.06 ± 0.87     | 0.01     |
| <b>2009-10</b>           | 26.64 ± 1.18     | <0.01*   | 14.54 ± 0.76     | <0.01*   | 10.06 ± 0.74     | <0.01*   | 1.94 ± 0.40      | <0.01*   | 2.62 ± 0.46      | 0.69     | 3.57 ± 0.24      | 0.07     | 39.75 ± 0.65     | <0.01*   |
| <b>2011-12</b>           | 24.98 ± 0.92     | <0.01*   | 13.25 ± 0.89     | <0.01*   | 9.49 ± 0.38      | <0.01*   | 2.20 ± 0.27      | <0.01*   | 3.84 ± 0.56      | 0.03     | 2.89 ± 0.44      | 0.91     | 39.73 ± 1.22     | <0.01*   |
| <b>2013-14</b>           | 22.71 ± 1.48     | <0.01*   | 12.76 ± 0.93     | <0.01*   | 6.64 ± 0.44      | <0.01*   | 3.16 ± 1.04      | <0.01*   | 3.52 ± 0.62      | 0.11     | 2.30 ± 0.22      | 0.04     | 38.72 ± 1.56     | <0.01*   |
| <b>2015-16</b>           | 18.85 ± 1.07     | <0.01*   | 10.86 ± 0.74     | <0.01*   | 6.22 ± 0.37      | <0.01*   | 1.58 ± 0.27      | <0.01*   | 2.97 ± 0.53      | 0.36     | 2.27 ± 0.21      | 0.03     | 37.55 ± 1.32     | <0.01*   |
| <b>2017-18</b>           | 17.97 ± 1.00     | <0.01*   | 9.95 ± 1.01      | <0.01*   | 5.92 ± 0.46      | <0.01*   | 1.80 ± 0.17      | <0.01*   | 3.29 ± 0.45      | 0.11     | 2.23 ± 0.24      | 0.03     | 39.16 ± 0.99     | <0.01*   |
| <b>Trend<sup>1</sup></b> | <b>Beta ± SE</b> | <b>P</b> |
|                          | -3.08 ± 0.23     | <0.01    | -2.21 ± 0.20     | <0.01    | -1.02 ± 0.08     | <0.01    | 0.13 ± 0.05      | 0.01     | 0.21 ± 0.07      | <0.01    | -0.11 ± 0.04     | <0.01    | -1.02 ± 0.15     | <0.01    |
| <b>Consumers Only</b>    |                  |          |                  |          |                  |          |                  |          |                  |          |                  |          |                  |          |
| <b>2-8 y</b>             |                  |          |                  |          |                  |          |                  |          |                  |          |                  |          |                  |          |
| <b>Year</b>              | <b>Mean ± SE</b> | <b>P</b> |
| <b>2003-04</b>           | 31.44 ± 1.73     |          | 22.67 ± 1.63     |          | 22.87 ± 1.59     |          | 14.05 ± 3.56     |          | 15.32 ± 3.53     |          | 11.55 ± 1.14     |          | 41.57 ± 1.31     |          |
| <b>2005-06</b>           | 24.77 ± 1.09     | <0.01*   | 17.34 ± 1.15     | 0.01     | 18.39 ± 0.86     | 0.01     | 13.42 ± 1.69     | 0.87     | 8.36 ± 0.88      | 0.06     | 10.54 ± 0.71     | 0.46     | 42.10 ± 1.26     | 0.77     |
| <b>2007-08</b>           | 25.15 ± 0.68     | <0.01*   | 17.72 ± 1.34     | 0.02     | 20.13 ± 0.84     | 0.13     | 7.96 ± 1.62      | 0.12     | 9.41 ± 1.10      | 0.11     | 11.30 ± 0.85     | 0.86     | 38.54 ± 1.08     | 0.08     |
| <b>2009-10</b>           | 23.29 ± 0.80     | <0.01*   | 16.04 ± 1.04     | <0.01*   | 19.80 ± 0.84     | 0.09     | 11.86 ± 1.67     | 0.58     | 13.07 ± 0.85     | 0.54     | 11.83 ± 0.66     | 0.83     | 35.70 ± 1.05     | <0.01*   |
| <b>2011-12</b>           | 23.27 ± 1.31     | <0.01*   | 17.10 ± 1.54     | 0.01     | 18.17 ± 1.10     | 0.02     | 11.35 ± 2.05     | 0.51     | 11.82 ± 1.54     | 0.36     | 11.37 ± 1.32     | 0.92     | 39.20 ± 1.30     | 0.20     |
| <b>2013-14</b>           | 20.41 ± 1.09     | <0.01*   | 15.18 ± 1.13     | <0.01*   | 15.82 ± 0.98     | <0.01*   | 12.33 ± 2.19     | 0.68     | 14.62 ± 3.13     | 0.88     | 9.39 ± 0.67      | 0.10     | 37.89 ± 1.70     | 0.09     |
| <b>2015-16</b>           | 19.89 ± 0.80     | <0.01*   | 16.98 ± 1.17     | 0.01     | 15.59 ± 0.97     | <0.01*   | 11.78 ± 2.67     | 0.61     | 11.79 ± 1.88     | 0.38     | 9.66 ± 0.80      | 0.18     | 34.97 ± 0.92     | <0.01*   |
| <b>2017-18</b>           | 18.15 ± 1.39     | <0.01*   | 15.48 ± 1.80     | <0.01*   | 14.39 ± 0.86     | <0.01*   | 11.66 ± 1.82     | 0.55     | 14.54 ± 2.18     | 0.85     | 9.95 ± 0.80      | 0.25     | 36.08 ± 1.32     | <0.01*   |
| <b>Trend<sup>1</sup></b> | <b>Beta ± SE</b> | <b>P</b> |
|                          | -1.60 ± 0.22     | <0.01    | -0.81 ± 0.25     | <0.01    | -1.05 ± 0.19     | <0.01    | 0.03 ± 0.38      | 0.93     | 0.19 ± 0.46      | 0.67     | -0.26 ± 0.14     | 0.07     | -0.86 ± 0.20     | <0.01    |
| <b>Consumers Only</b>    |                  |          |                  |          |                  |          |                  |          |                  |          |                  |          |                  |          |
| <b>9-18 y</b>            |                  |          |                  |          |                  |          |                  |          |                  |          |                  |          |                  |          |
| <b>Year</b>              | <b>Mean ± SE</b> | <b>P</b> |
| <b>2003-04</b>           | 55.61 ± 2.11     |          | 47.02 ± 2.00     |          | 28.79 ± 1.63     |          | 12.09 ± 2.64     |          | 16.21 ± 1.38     |          | 10.83 ± 0.58     |          | 47.15 ± 1.10     |          |
| <b>2005-06</b>           | 53.54 ± 3.75     | 0.63     | 46.00 ± 4.08     | 0.82     | 24.91 ± 1.01     | 0.04     | 23.50 ± 0.70     | <0.01*   | 17.05 ± 1.67     | 0.70     | 11.57 ± 1.43     | 0.63     | 46.44 ± 0.85     | 0.61     |
| <b>2007-08</b>           | 47.65 ± 2.49     | 0.02     | 41.69 ± 3.19     | 0.16     | 24.75 ± 0.96     | 0.03     | 21.65 ± 2.18     | 0.01     | 16.98 ± 1.83     | 0.74     | 8.98 ± 0.57      | 0.02     | 44.44 ± 1.27     | 0.11     |
| <b>2009-10</b>           | 43.15 ± 1.98     | <0.01*   | 35.25 ± 1.26     | <0.01*   | 25.77 ± 1.36     | 0.16     | 19.66 ± 2.08     | 0.03     | 23.20 ± 3.32     | 0.05     | 10.81 ± 0.69     | 0.98     | 42.54 ± 0.90     | <0.01*   |
| <b>2011-12</b>           | 37.57 ± 1.38     | <0.01*   | 31.76 ± 1.41     | <0.01*   | 22.57 ± 1.38     | <0.01*   | 20.42 ± 1.13     | <0.01*   | 28.98 ± 2.64     | <0.01*   | 9.51 ± 0.45      | 0.07     | 40.11 ± 1.68     | <0.01*   |
| <b>2013-14</b>           | 40.18 ± 3.07     | <0.01*   | 36.20 ± 2.13     | <0.01*   | 17.46 ± 0.68     | <0.01*   | 30.35 ± 10.15    | 0.08     | 26.49 ± 4.45     | 0.03     | 8.92 ± 0.95      | 0.09     | 39.31 ± 1.76     | <0.01*   |

Intakes of added sugars with a focus on beverages and the associations with micronutrient adequacy in US children, adolescents and teens (NHANES 2003-2018), Ricciuto, L., et al.

|                          |                  |          |                  |          |                  |          |                  |          |                  |          |                  |          |                  |          |
|--------------------------|------------------|----------|------------------|----------|------------------|----------|------------------|----------|------------------|----------|------------------|----------|------------------|----------|
| <b>2015-16</b>           | 32.43 ± 1.70     | <0.01*   | 30.27 ± 1.32     | <0.01*   | 18.24 ± 1.32     | <0.01*   | 18.69 ± 2.63     | 0.08     | 25.97 ± 2.05     | <0.01*   | 8.83 ± 0.58      | 0.02     | 39.43 ± 1.85     | <0.01*   |
| <b>2017-18</b>           | 31.35 ± 2.16     | <0.01*   | 29.99 ± 2.27     | <0.01*   | 18.35 ± 1.47     | <0.01*   | 18.16 ± 1.14     | 0.04     | 21.15 ± 1.72     | 0.03     | 8.05 ± 0.70      | <0.01*   | 41.24 ± 1.25     | <0.01*   |
| <b>Trend<sup>1</sup></b> | <b>Beta ± SE</b> | <b>P</b> |
|                          | -3.63 ± 0.38     | <0.01    | -2.67 ± 0.38     | <0.01    | -1.58 ± 0.22     | <0.01    | -0.30 ± 0.53     | 0.57     | 1.25 ± 0.29      | <0.01    | -0.41 ± 0.13     | <0.01    | -1.11 ± 0.20     | <0.01    |
| <b>Consumers Only</b>    |                  |          |                  |          |                  |          |                  |          |                  |          |                  |          |                  |          |
| <b>2-18 y</b>            |                  |          |                  |          |                  |          |                  |          |                  |          |                  |          |                  |          |
| <b>Year</b>              | <b>Mean ± SE</b> | <b>P</b> |
| <b>2003-04</b>           | 46.51 ± 1.79     |          | 39.05 ± 1.85     |          | 26.25 ± 1.06     |          | 12.53 ± 1.99     |          | 15.91 ± 1.60     |          | 11.21 ± 0.68     |          | 44.93 ± 0.65     |          |
| <b>2005-06</b>           | 43.06 ± 2.48     | 0.26     | 37.72 ± 2.92     | 0.70     | 21.93 ± 0.61     | <0.01*   | 20.70 ± 0.61     | <0.01*   | 14.85 ± 1.60     | 0.64     | 11.05 ± 0.72     | 0.87     | 44.72 ± 0.84     | 0.84     |
| <b>2007-08</b>           | 39.01 ± 1.59     | <0.01*   | 34.11 ± 2.38     | 0.10     | 22.54 ± 0.67     | <0.01*   | 18.52 ± 2.36     | 0.05     | 14.73 ± 1.39     | 0.58     | 10.16 ± 0.56     | 0.23     | 42.09 ± 0.86     | 0.01     |
| <b>2009-10</b>           | 35.82 ± 1.28     | <0.01*   | 29.88 ± 0.95     | <0.01*   | 23.09 ± 0.81     | 0.02     | 17.90 ± 1.73     | 0.04     | 20.54 ± 2.56     | 0.13     | 11.28 ± 0.34     | 0.93     | 39.78 ± 0.65     | <0.01*   |
| <b>2011-12</b>           | 32.06 ± 1.20     | <0.01*   | 26.97 ± 1.23     | <0.01*   | 20.54 ± 0.79     | <0.01*   | 18.10 ± 1.28     | 0.02     | 24.32 ± 2.60     | 0.01     | 10.50 ± 0.87     | 0.52     | 39.73 ± 1.22     | <0.01*   |
| <b>2013-14</b>           | 33.48 ± 2.18     | <0.01*   | 31.07 ± 1.95     | <0.01*   | 16.76 ± 0.61     | <0.01*   | 25.19 ± 7.22     | 0.09     | 23.62 ± 3.49     | 0.05     | 9.14 ± 0.65      | 0.03     | 38.75 ± 1.56     | <0.01*   |
| <b>2015-16</b>           | 27.96 ± 1.23     | <0.01*   | 26.93 ± 0.98     | <0.01*   | 16.98 ± 0.76     | <0.01*   | 16.77 ± 2.24     | 0.16     | 22.36 ± 1.21     | <0.01*   | 9.19 ± 0.42      | 0.01     | 37.63 ± 1.33     | <0.01*   |
| <b>2017-18</b>           | 26.70 ± 1.40     | <0.01*   | 25.84 ± 1.77     | <0.01*   | 16.69 ± 0.93     | <0.01*   | 16.09 ± 0.90     | 0.11     | 19.49 ± 1.36     | 0.09     | 9.02 ± 0.61      | 0.02     | 39.22 ± 1.01     | <0.01*   |
| <b>Trend<sup>1</sup></b> | <b>Beta ± SE</b> | <b>P</b> |
|                          | -2.82 ± 0.27     | <0.01    | -1.96 ± 0.31     | <0.01    | -1.34 ± 0.14     | <0.01    | -0.31 ± 0.39     | 0.43     | 1.04 ± 0.25      | <0.01    | -0.34 ± 0.10     | <0.01    | -1.01 ± 0.15     | <0.01    |

\*Significantly different from reference cycle (2003-04), p<0.01

<sup>1</sup>Linear trend across all cycles, statistically significant at p<0.01



Intakes of added sugars with a focus on beverages and the associations with micronutrient adequacy in US children, adolescents and teens (NHANES 2003-2018), Ricciuto, L., et al.

**Supplemental Table S4.** Trends in % <EAR (>AI<sup>1</sup>) for selected micronutrients by beverage source of added sugars and the rest of the diet among children, adolescents and teens (2-18 y) from the pooled sample (NHANES 2003-2018, n=21,005); weighted n's are shown in the table.

| 2-18 y                 |                                                |                                   |                                   |                                   |                                             |                                            |                                          |
|------------------------|------------------------------------------------|-----------------------------------|-----------------------------------|-----------------------------------|---------------------------------------------|--------------------------------------------|------------------------------------------|
| Sweetened Beverages    |                                                |                                   |                                   |                                   |                                             |                                            |                                          |
|                        | Q1 <sup>2</sup><br>n=17,501,646<br>% <EAR (SE) | Q2<br>n=17,351,739<br>% <EAR (SE) | Q3<br>n=17,431,391<br>% <EAR (SE) | Q4<br>n=17,421,108<br>% <EAR (SE) | Quantile Trend <sup>3</sup><br>Beta (SE), P | Q1 vs. Q2,3,4 <sup>4</sup><br>Beta (SE), P | Q2-Q4 Trend <sup>5</sup><br>Beta (SE), P |
| Calcium                | 38.65 (1.49)                                   | 45.62 (1.31)                      | 52.41 (1.51)                      | 49.46 (1.47)                      | 3.77 (1.75), 0.16                           | 10.61 (4.14), 0.12                         | 1.81 (2.83), 0.64                        |
| Magnesium              | 27.88 (1.15)                                   | 33.70 (1.24)                      | 39.18 (1.18)                      | 42.02 (1.03)                      | 4.74 (0.51), 0.01                           | 10.60 (5.17), 0.18                         | 4.13 (0.77), 0.12                        |
| Phosphorus             | 13.54 (1.10)                                   | 16.48 (1.04)                      | 18.17 (1.13)                      | 12.03 (1.12)                      | -0.42 (1.54), 0.81                          | 1.94 (3.99), 0.67                          | -2.31 (2.27), 0.49                       |
| Vitamin A              | 17.44 (1.41)                                   | 20.45 (1.30)                      | 29.08 (1.33)                      | 32.92 (1.62)                      | 5.53 (0.75), 0.02§                          | 10.32 (7.80), 0.32                         | 6.18 (1.39), 0.14                        |
| Vitamin C              | 20.93 (1.40)                                   | 17.79 (1.48)                      | 19.00 (1.58)                      | 18.17 (1.74)                      | -0.67 (0.57), 0.36                          | -2.60 (0.75), 0.07                         | 0.17 (0.59), 0.83                        |
| Vitamin D              | 88.86 (1.08)                                   | 91.38 (0.91)                      | 93.99 (0.80)                      | 94.17 (0.73)                      | 1.82 (0.42), 0.05                           | 4.38 (1.90), 0.15                          | 1.37 (0.70), 0.30                        |
| Choline <sup>1</sup>   | 26.55 (1.27)                                   | 18.80 (1.18)                      | 17.38 (1.04)                      | 17.52 (0.96)                      | -2.82 (1.31), 0.16                          | -8.65 (0.93), 0.01§                        | -0.64 (0.46), 0.39                       |
| Potassium <sup>1</sup> | 37.51 (1.63)                                   | 32.91 (1.76)                      | 30.32 (1.60)                      | 32.91 (1.39)                      | -1.53 (1.18), 0.32                          | -5.47 (1.85), 0.10                         | 0.05 (1.51), 0.98                        |
| Soft Drinks            |                                                |                                   |                                   |                                   |                                             |                                            |                                          |
|                        | Q1 <sup>2</sup><br>n=35,273,939<br>% <EAR (SE) | Q2<br>n=11,356,667<br>% <EAR (SE) | Q3<br>n=11,573,927<br>% <EAR (SE) | Q4<br>n=11,501,350<br>% <EAR (SE) | Quantile Trend <sup>3</sup><br>Beta (SE), P | Q1 vs. Q2,3,4 <sup>4</sup><br>Beta (SE), P | Q2-Q4 Trend <sup>5</sup><br>Beta (SE), P |
| Calcium                | 39.20 (0.98)                                   | 53.39 (1.66)                      | 55.34 (1.96)                      | 52.54 (1.76)                      | 5.33 (2.45), 0.16                           | 14.55 (1.18), 0.01†                        | -0.40 (1.36), 0.82                       |
| Magnesium              | 26.44 (0.73)                                   | 40.28 (1.71)                      | 45.12 (1.21)                      | 50.01 (1.32)                      | 8.22 (1.40), 0.03§                          | 18.61 (4.04), 0.04§                        | 4.87 (0.02), 0.00†                       |
| Phosphorus             | 12.88 (0.68)                                   | 20.67 (1.30)                      | 17.92 (1.54)                      | 12.85 (1.47)                      | 0.61 (1.90), 0.78                           | 4.33 (3.28), 0.32                          | -3.90 (0.67), 0.11                       |
| Vitamin A              | 17.26 (0.94)                                   | 26.84 (1.74)                      | 33.92 (1.75)                      | 37.91 (2.05)                      | 7.24 (0.78), 0.01§                          | 15.52 (4.66), 0.08                         | 5.55 (0.88), 0.10                        |
| Vitamin C              | 12.58 (0.93)                                   | 20.01 (1.75)                      | 24.59 (2.14)                      | 31.66 (2.56)                      | 6.27 (0.32), 0.00†                          | 12.74 (4.86), 0.12                         | 5.81 (0.71), 0.08                        |
| Vitamin D              | 90.25 (0.67)                                   | 94.22 (0.96)                      | 94.01 (0.97)                      | 94.00 (0.94)                      | 1.40 (0.63), 0.16                           | 3.82 (0.10), 0.00†                         | -0.11 (0.06), 0.31                       |
| Choline <sup>1</sup>   | 25.05 (0.86)                                   | 15.16 (1.22)                      | 13.69 (1.28)                      | 15.52 (1.34)                      | -3.94 (1.72), 0.15                          | -10.28 (0.77), 0.01†                       | 0.12 (0.96), 0.92                        |
| Potassium <sup>1</sup> | 37.80 (1.15)                                   | 28.56 (1.86)                      | 28.79 (1.94)                      | 30.00 (1.87)                      | -3.06 (1.58), 0.19                          | -8.69 (0.64), 0.01†                        | 0.71 (0.28), 0.24                        |
| Fruit Drinks           |                                                |                                   |                                   |                                   |                                             |                                            |                                          |
|                        | Q1 <sup>2</sup><br>n=39,689,880<br>% <EAR (SE) | Q2<br>n=9,979,489<br>% <EAR (SE)  | Q3<br>n=10,027,750<br>% <EAR (SE) | Q4<br>n=10,008,765<br>% <EAR (SE) | Quantile Trend <sup>3</sup><br>Beta (SE), P | Q1 vs. Q2,3,4 <sup>4</sup><br>Beta (SE), P | Q2-Q4 Trend <sup>5</sup><br>Beta (SE), P |
| Calcium                | 46.71 (1.05)                                   | 45.00 (2.01)                      | 47.69 (1.55)                      | 45.14 (1.71)                      | -0.29 (0.52), 0.63                          | -0.77 (1.22), 0.59                         | -0.04 (1.51), 0.99                       |
| Magnesium              | 39.63 (0.86)                                   | 29.11 (1.40)                      | 31.33 (1.37)                      | 29.66 (1.17)                      | -3.49 (1.48), 0.14                          | -9.58 (0.91), 0.01†                        | 0.20 (1.12), 0.89                        |
| Phosphorus             | 16.07 (0.80)                                   | 15.42 (1.38)                      | 13.97 (1.52)                      | 10.97 (1.21)                      | -1.55 (0.31), 0.04                          | -2.80 (1.85), 0.27                         | -2.25 (0.45), 0.12                       |
| Vitamin A              | 26.68 (1.02)                                   | 20.83 (1.73)                      | 21.39 (1.32)                      | 24.71 (1.73)                      | -1.09 (1.23), 0.47                          | -4.20 (1.73), 0.14                         | 2.00 (0.79), 0.24                        |

Intakes of added sugars with a focus on beverages and the associations with micronutrient adequacy in US children, adolescents and teens (NHANES 2003-2018), Ricciuto, L., et al.

|                                |                                                      |                                         |                                         |                                         |                                                   |                                                  |                                                |
|--------------------------------|------------------------------------------------------|-----------------------------------------|-----------------------------------------|-----------------------------------------|---------------------------------------------------|--------------------------------------------------|------------------------------------------------|
| <b>Vitamin C</b>               | 29.96 (1.22)                                         | 11.20 (1.69)                            | 4.03 (1.46)                             | 1.47 (1.02)                             | -10.25 (2.17), 0.04§                              | -24.79 (4.00), 0.03§                             | -4.77 (1.33), 0.17                             |
| <b>Vitamin D</b>               | 90.91 (0.63)                                         | 93.33 (0.92)                            | 94.14 (0.94)                            | 93.93 (0.95)                            | 1.14 (0.35), 0.08                                 | 2.91 (0.33), 0.01                                | 0.28 (0.30), 0.52                              |
| <b>Choline<sup>1</sup></b>     | 19.90 (0.75)                                         | 20.49 (1.66)                            | 20.07 (1.44)                            | 20.34 (1.51)                            | 0.14 (0.10), 0.32                                 | 0.40 (0.17), 0.14                                | -0.07 (0.20), 0.79                             |
| <b>Potassium<sup>1</sup></b>   | 32.68 (1.10)                                         | 30.58 (1.90)                            | 33.39 (2.01)                            | 39.11 (1.83)                            | 1.75 (1.04), 0.23                                 | 2.03 (3.56), 0.63                                | 4.33 (0.84), 0.12                              |
| <b>Sport and Energy Drinks</b> |                                                      |                                         |                                         |                                         |                                                   |                                                  |                                                |
|                                | <b>Q1<sup>2</sup></b><br>n=62,719,734<br>% <EAR (SE) | <b>Q2</b><br>n=2,248,682<br>% <EAR (SE) | <b>Q3</b><br>n=2,358,945<br>% <EAR (SE) | <b>Q4</b><br>n=2,378,523<br>% <EAR (SE) | <b>Quantile Trend<sup>3</sup></b><br>Beta (SE), P | <b>Q1 vs. Q2,3,4<sup>4</sup></b><br>Beta (SE), P | <b>Q2-Q4 Trend<sup>5</sup></b><br>Beta (SE), P |
| <b>Calcium</b>                 | 46.17 (0.85)                                         | 56.69 (3.40)                            | 47.72 (4.59)                            | 41.41 (4.56)                            | -0.06 (2.34), 0.98                                | 2.68 (4.64), 0.62                                | -7.66 (0.77), 0.06                             |
| <b>Magnesium</b>               | 34.53 (0.69)                                         | 48.67 (3.30)                            | 45.87 (3.13)                            | 43.22 (3.77)                            | 4.48 (2.21), 0.18                                 | 11.47 (1.64), 0.02§                              | -2.73 (0.05), 0.01                             |
| <b>Phosphorus</b>              | 14.76 (0.63)                                         | 23.34 (3.55)                            | 14.94 (3.58)                            | 13.83 (2.73)                            | 0.42 (1.71), 0.83                                 | 2.75 (3.17), 0.48                                | -4.82 (2.12), 0.26                             |
| <b>Vitamin A</b>               | 24.24 (0.80)                                         | 32.38 (3.15)                            | 32.88 (4.47)                            | 26.86 (5.27)                            | 2.38 (1.65), 0.28                                 | 6.56 (1.99), 0.08                                | -2.71 (1.89), 0.39                             |
| <b>Vitamin C</b>               | 19.31 (0.86)                                         | 10.27 (5.03)                            | 21.56 (3.86)                            | 15.52 (6.57)                            | -1.10 (1.84), 0.61                                | -3.58 (3.45), 0.41                               | 2.76 (5.03), 0.68                              |
| <b>Vitamin D</b>               | 92.00 (0.52)                                         | 94.51 (1.85)                            | 92.17 (2.24)                            | 91.76 (2.74)                            | 0.15 (0.50), 0.79                                 | 0.86 (0.90), 0.44                                | -1.39 (0.56), 0.24                             |
| <b>Choline<sup>1</sup></b>     | 20.98 (0.69)                                         | 13.20 (2.16)                            | 14.64 (2.26)                            | 14.96 (3.10)                            | -2.73 (1.12), 0.13                                | -6.73 (0.57), 0.01†                              | 0.89 (0.32), 0.22                              |
| <b>Potassium<sup>1</sup></b>   | 33.14 (1.11)                                         | 27.58 (3.25)                            | 31.21 (3.78)                            | 39.07 (4.40)                            | 0.60 (1.60), 0.75                                 | -0.71 (3.52), 0.86                               | 5.71 (1.23), 0.13                              |
| <b>Coffee and Tea</b>          |                                                      |                                         |                                         |                                         |                                                   |                                                  |                                                |
|                                | <b>Q1<sup>2</sup></b><br>n=59,622,348<br>% <EAR (SE) | <b>Q2</b><br>n=3,317,496<br>% <EAR (SE) | <b>Q3</b><br>n=3,406,193<br>% <EAR (SE) | <b>Q4</b><br>n=3,359,846<br>% <EAR (SE) | <b>Quantile Trend<sup>3</sup></b><br>Beta (SE), P | <b>Q1 vs. Q2,3,4<sup>4</sup></b><br>Beta (SE), P | <b>Q2-Q4 Trend<sup>5</sup></b><br>Beta (SE), P |
| <b>Calcium</b>                 | 44.58 (0.85)                                         | 62.76 (2.63)                            | 55.44 (3.77)                            | 53.26 (3.80)                            | 4.79 (3.12), 0.26                                 | 12.95 (3.12), 0.05                               | -4.86 (1.51), 0.19                             |
| <b>Magnesium</b>               | 33.76 (0.72)                                         | 45.71 (2.51)                            | 44.96 (2.37)                            | 46.90 (3.22)                            | 5.31 (1.54), 0.08                                 | 12.03 (0.58), 0.00†                              | 0.53 (0.79), 0.62                              |
| <b>Phosphorus</b>              | 14.23 (0.68)                                         | 23.12 (2.22)                            | 19.06 (2.53)                            | 16.01 (3.35)                            | 1.76 (1.71), 0.41                                 | 5.47 (2.20), 0.13                                | -3.58 (0.30), 0.05                             |
| <b>Vitamin A</b>               | 23.21 (0.85)                                         | 33.94 (3.54)                            | 32.72 (3.63)                            | 38.89 (3.72)                            | 5.48 (1.19), 0.04§                                | 11.72 (1.94), 0.03§                              | 2.31 (2.17), 0.48                              |
| <b>Vitamin C</b>               | 17.03 (0.92)                                         | 28.35 (3.72)                            | 27.66 (4.54)                            | 36.95 (4.57)                            | 6.56 (1.17), 0.03§                                | 13.54 (3.07), 0.05§                              | 4.07 (2.93), 0.40                              |
| <b>Vitamin D</b>               | 91.47 (0.56)                                         | 96.73 (0.97)                            | 95.76 (1.21)                            | 93.74 (1.92)                            | 1.52 (0.96), 0.26                                 | 4.07 (0.92), 0.05                                | -1.47 (0.31), 0.13                             |
| <b>Choline<sup>1</sup></b>     | 21.15 (0.67)                                         | 13.94 (1.69)                            | 16.12 (2.21)                            | 13.77 (2.22)                            | -2.80 (0.96), 0.10                                | -6.52 (0.82), 0.02§                              | -0.01 (1.33), 0.99                             |
| <b>Potassium<sup>1</sup></b>   | 33.33 (0.96)                                         | 29.22 (3.06)                            | 33.41 (3.03)                            | 41.05 (3.88)                            | 1.29 (1.48), 0.47                                 | 0.70 (3.63), 0.86                                | 5.84 (1.02), 0.11                              |
| <b>Flavored Milk</b>           |                                                      |                                         |                                         |                                         |                                                   |                                                  |                                                |
|                                | <b>Q1<sup>2</sup></b><br>n=51,222,508<br>% <EAR (SE) | <b>Q2</b><br>n=5,797,437<br>% <EAR (SE) | <b>Q3</b><br>n=6,342,564<br>% <EAR (SE) | <b>Q4</b><br>n=6,343,373<br>% <EAR (SE) | <b>Quantile Trend<sup>3</sup></b><br>Beta (SE), P | <b>Q1 vs. Q2,3,4<sup>4</sup></b><br>Beta (SE), P | <b>Q2-Q4 Trend<sup>5</sup></b><br>Beta (SE), P |
| <b>Calcium</b>                 | 52.59 (0.94)                                         | 38.64 (2.97)                            | 30.18 (2.51)                            | 10.15 (2.39)                            | -13.30 (1.07), 0.01†                              | -26.06 (9.76), 0.12                              | -14.21 (3.39), 0.15                            |
| <b>Magnesium</b>               | 40.50 (0.79)                                         | 22.34 (1.95)                            | 23.04 (1.74)                            | 18.56 (1.67)                            | -8.20 (2.17), 0.06                                | -19.14 (1.61), 0.01†                             | -1.87 (1.52), 0.43                             |
| <b>Phosphorus</b>              | 18.87 (0.70)                                         | 7.68 (1.32)                             | 5.03 (1.40)                             | 0.61 (0.36)                             | -6.55 (1.03), 0.02§                               | -14.38 (2.38), 0.03                              | -3.53 (0.52), 0.09                             |

Intakes of added sugars with a focus on beverages and the associations with micronutrient adequacy in US children, adolescents and teens (NHANES 2003-2018), Ricciuto, L., et al.

|                                 |                                    |                                             |                                              |                                     |                                   |                      |                    |
|---------------------------------|------------------------------------|---------------------------------------------|----------------------------------------------|-------------------------------------|-----------------------------------|----------------------|--------------------|
| <b>Vitamin A</b>                | 30.00 (0.90)                       | 10.85 (2.58)                                | 11.02 (1.85)                                 | 6.74 (1.26)                         | -8.75 (2.29), 0.06                | -20.42 (1.62), 0.01† | -2.05 (1.30), 0.36 |
| <b>Vitamin C</b>                | 20.72 (1.07)                       | 11.92 (1.66)                                | 15.25 (1.99)                                 | 16.24 (1.85)                        | -2.17 (1.47), 0.28                | -6.26 (1.52), 0.05   | 2.17 (0.69), 0.20  |
| <b>Vitamin D</b>                | 93.44 (0.47)                       | 98.77 (0.83)                                | 93.45 (2.03)                                 | 84.90 (4.14)                        | -1.68 (1.79), 0.45                | -0.98 (4.67), 0.85   | -6.92 (0.95), 0.09 |
| <b>Choline<sup>1</sup></b>      | 18.20 (0.71)                       | 17.85 (1.63)                                | 22.75 (2.45)                                 | 34.72 (2.19)                        | 4.29 (1.53), 0.11                 | 6.58 (5.77), 0.37    | 8.38 (2.08), 0.16  |
| <b>Potassium<sup>1</sup></b>    | 29.90 (0.96)                       | 31.52 (2.36)                                | 40.04 (2.67)                                 | 62.96 (3.11)                        | 8.91 (2.61), 0.08                 | 14.70 (10.85), 0.31  | 15.68 (4.22), 0.17 |
| <b>Rest of the Diet</b>         |                                    |                                             |                                              |                                     |                                   |                      |                    |
| <b>Added Sugars</b><br>(% kcal) | <b>Q1</b><br>n=17,415,441<br>≤5.19 | <b>Q2</b><br>n=17,427,804<br>>5.19 to ≤7.95 | <b>Q3</b><br>n=17,414,410<br>>7.95 to ≤11.15 | <b>Q4</b><br>n=17,448,227<br>>11.15 | <b>Quartile Trend<sup>6</sup></b> |                      |                    |
|                                 | <b>% &lt;EAR (SE)</b>              | <b>% &lt;EAR (SE)</b>                       | <b>% &lt;EAR (SE)</b>                        | <b>% &lt;EAR (SE)</b>               | <b>Beta (SE), P</b>               |                      |                    |
| <b>Calcium</b>                  | 62.10 (1.25)                       | 46.58 (1.34)                                | 43.28 (1.72)                                 | 30.43 (1.41)                        | -9.91 (1.58), 0.02§               |                      |                    |
| <b>Magnesium</b>                | 49.74 (1.19)                       | 36.71 (1.09)                                | 31.88 (1.17)                                 | 21.35 (1.08)                        | -9.07 (1.05), 0.01§               |                      |                    |
| <b>Phosphorus</b>               | 31.14 (1.41)                       | 14.70 (1.09)                                | 10.37 (1.01)                                 | 4.13 (0.55)                         | -8.72 (1.90), 0.04§               |                      |                    |
| <b>Vitamin A</b>                | 46.41 (1.39)                       | 24.15 (1.44)                                | 17.63 (1.66)                                 | 7.25 (1.16)                         | -12.62 (2.34), 0.03§              |                      |                    |
| <b>Vitamin C</b>                | 26.58 (1.63)                       | 19.83 (1.42)                                | 16.86 (1.61)                                 | 12.55 (1.37)                        | -4.55 (0.53), 0.01                |                      |                    |
| <b>Vitamin D</b>                | 95.05 (0.55)                       | 93.57 (0.99)                                | 92.11 (0.81)                                 | 88.63 (1.02)                        | -2.04 (0.34), 0.03                |                      |                    |
| <b>Choline<sup>1</sup></b>      | 17.22 (0.96)                       | 19.03 (1.19)                                | 19.66 (1.23)                                 | 23.01 (1.33)                        | 1.78 (0.35), 0.04                 |                      |                    |
| <b>Potassium<sup>1</sup></b>    | 19.33 (1.38)                       | 30.64 (1.68)                                | 34.04 (1.53)                                 | 49.95 (1.77)                        | 9.49 (1.56), 0.03§                |                      |                    |

EAR, estimated average requirement; AI, adequate intake

<sup>1</sup>>AI for choline and potassium

<sup>2</sup>Quantile 1 represents non-consumers; the remaining sample of those reporting intake (consumers) was divided into tertiles (quantiles 2, 3 and 4)

<sup>3</sup>From regression analysis among all individuals, test for trend

<sup>4</sup>From regression analysis among all individuals, test for differences between non-consumers (Q1) and consumers (Q2,3,4)

<sup>5</sup>From regression analysis among consumers (Q2-Q4), test for trend

<sup>6</sup>From regression analysis, test for trend

†Statistically significant at p<0.01; §Statistically significant at p<0.05

Intakes of added sugars with a focus on beverages and the associations with micronutrient adequacy in US children, adolescents and teens (NHANES 2003-2018), Ricciuto, L., et al.

**A**

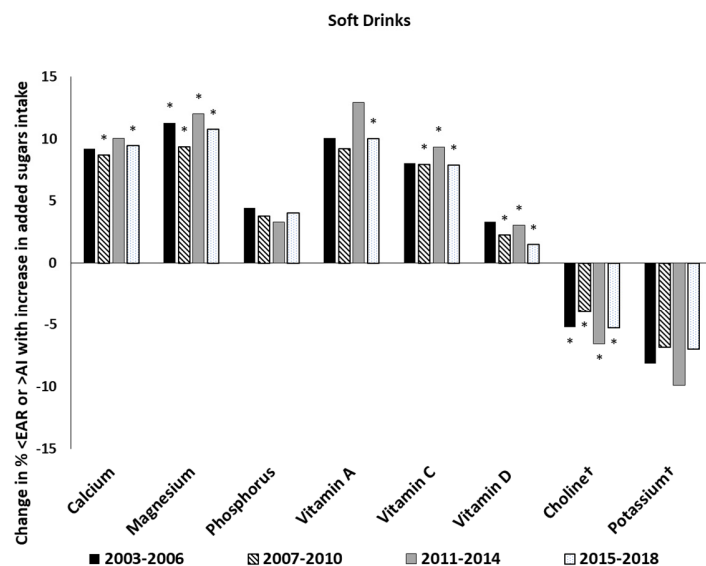

**B**

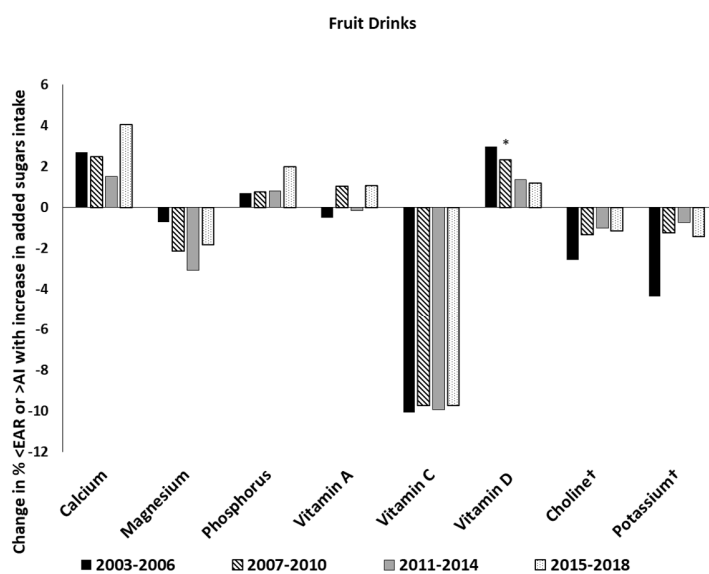

Intakes of added sugars with a focus on beverages and the associations with micronutrient adequacy in US children, adolescents and teens (NHANES 2003-2018), Ricciuto, L., et al.

**C**

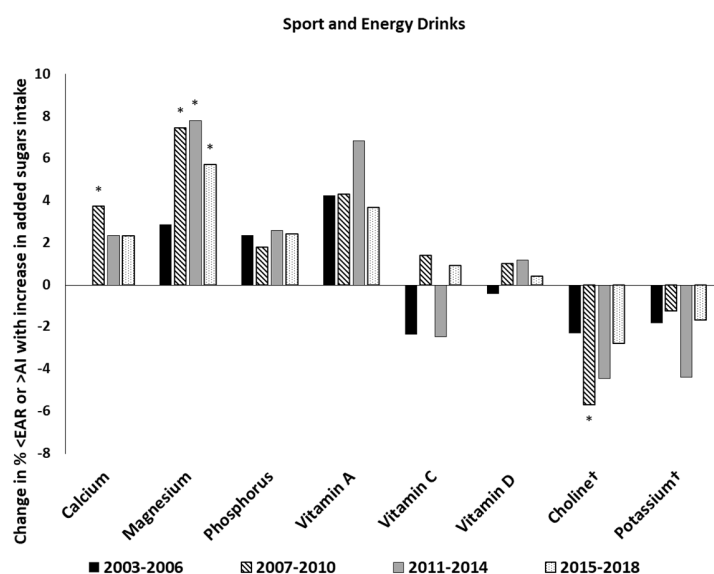

**D**

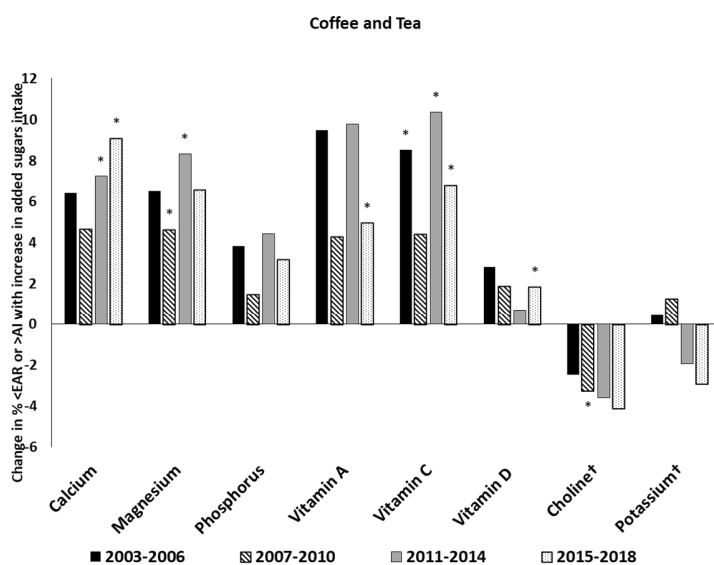

**Supplemental Figure S2.** Change in % <EAR (>AI<sup>†</sup>) in association with increased added sugars intake from select beverage sources: **A.** soft drinks and **B.** fruit drinks, by NHANES 4-y cycles, among children, adolescents and teens (2-18 y). **C.** sport and energy drinks and **D.** coffee and tea, by NHANES 4-y cycles, among children, adolescents and teens (2-18 y).

EAR, estimated average requirement; AI, adequate intake

<sup>†</sup>>AI for choline and potassium

\*Statistically significant at  $p < 0.05$ ; from regression analysis, test for trend across quantiles of added sugars intake.

Intakes of added sugars with a focus on beverages and the associations with micronutrient adequacy in US children, adolescents and teens (NHANES 2003-2018), Ricciuto, L., et al.

**Supplemental Table S5.** Association between added sugars intake from select beverages and % <EAR (>AI<sup>1</sup>) among children, adolescents and teens (2-18 y) by NHANES 4-y cycles.

|                                | NHANES<br>2003-2006       | NHANES<br>2007-2010 | NHANES<br>2011-2014 | NHANES<br>2015-2018 |
|--------------------------------|---------------------------|---------------------|---------------------|---------------------|
| <b>Soft Drinks</b>             |                           |                     |                     |                     |
| Nutrient                       | Beta (SE), P <sup>2</sup> | Beta (SE), P        | Beta (SE), P        | Beta (SE), P        |
| Calcium                        | 9.18 (3.00), 0.09         | 8.71 (1.75), 0.04*  | 10.02 (2.60), 0.06  | 9.43 (2.19), 0.05*  |
| Magnesium                      | 11.26 (2.41), 0.04*       | 9.35 (1.23), 0.02*  | 11.98 (2.18), 0.03* | 10.74 (1.49), 0.02* |
| Phosphorus                     | 4.42 (2.61), 0.23         | 3.76 (1.47), 0.12   | 3.32 (2.16), 0.26   | 4.05 (3.15), 0.33   |
| Vitamin A                      | 10.05 (3.26), 0.09        | 9.20 (2.38), 0.06   | 12.93 (4.93), 0.12  | 10.01 (1.32), 0.02* |
| Vitamin C                      | 8.05 (3.32), 0.14         | 7.94 (1.17), 0.02*  | 9.34 (1.83), 0.04*  | 7.89 (1.16), 0.02*  |
| Vitamin D                      | 3.35 (0.81), 0.05         | 2.25 (0.43), 0.03*  | 3.04 (0.45), 0.02*  | 1.49 (0.14), 0.01*  |
| Choline <sup>1</sup>           | -5.22 (1.02), 0.04*       | -3.94 (0.52), 0.02* | -6.56 (1.19), 0.03* | -5.26 (0.24), 0.00* |
| Potassium <sup>1</sup>         | -8.14 (4.12), 0.19        | -6.84 (2.15), 0.09  | -9.90 (3.55), 0.11  | -6.98 (3.60), 0.19  |
| <b>Fruit Drinks</b>            |                           |                     |                     |                     |
| Nutrient                       | Beta (SE), P              | Beta (SE), P        | Beta (SE), P        | Beta (SE), P        |
| Calcium                        | 2.72 (3.10), 0.47         | 2.48 (3.66), 0.57   | 1.53 (3.21), 0.68   | 4.05 (3.45), 0.36   |
| Magnesium                      | -0.71 (4.18), 0.88        | -2.12 (2.90), 0.54  | -3.06 (3.25), 0.45  | -1.83 (3.73), 0.67  |
| Phosphorus                     | 0.70 (2.54), 0.81         | 0.76 (1.86), 0.72   | 0.81 (2.73), 0.79   | 2.01 (3.28), 0.60   |
| Vitamin A                      | -0.50 (2.86), 0.88        | 1.03 (2.50), 0.72   | -0.13 (4.20), 0.98  | 1.08 (3.32), 0.78   |
| Vitamin C                      | -10.07 (2.65), 0.06       | -9.73 (2.46), 0.06  | -9.94 (2.88), 0.07  | -9.72 (3.39), 0.10  |
| Vitamin D                      | 2.98 (1.54), 0.19         | 2.33 (0.17), 0.01*  | 1.36 (0.38), 0.07   | 1.19 (0.40), 0.10   |
| Choline <sup>1</sup>           | -2.55 (3.30), 0.52        | -1.32 (1.50), 0.47  | -1.01 (0.33), 0.09  | -1.16 (2.32), 0.67  |
| Potassium <sup>1</sup>         | -4.35 (4.61), 0.44        | -1.24 (2.39), 0.66  | -0.73 (1.72), 0.71  | -1.42 (1.89), 0.53  |
| <b>Sport and Energy Drinks</b> |                           |                     |                     |                     |
| Nutrient                       | Beta (SE), P              | Beta (SE), P        | Beta (SE), P        | Beta (SE), P        |
| Calcium                        | 0.00 (7.41), 1.00         | 3.72 (0.80), 0.04*  | 2.35 (2.25), 0.41   | 2.33 (3.81), 0.60   |
| Magnesium                      | 2.86 (3.75), 0.53         | 7.43 (1.24), 0.03*  | 7.79 (1.66), 0.04*  | 5.71 (1.07), 0.03*  |
| Phosphorus                     | 2.37 (3.66), 0.58         | 1.80 (2.23), 0.50   | 2.59 (4.20), 0.60   | 2.42 (3.32), 0.54   |
| Vitamin A                      | 4.23 (3.88), 0.39         | 4.29 (3.51), 0.35   | 6.83 (1.60), 0.05   | 3.66 (2.89), 0.33   |
| Vitamin C                      | -2.39 (4.51), 0.65        | 1.41 (3.31), 0.71   | -2.50 (1.02), 0.13  | 0.92 (5.40), 0.88   |
| Vitamin D                      | -0.42 (4.03), 0.93        | 1.01 (2.22), 0.69   | 1.19 (0.82), 0.28   | 0.42 (1.51), 0.81   |
| Choline <sup>1</sup>           | -2.31 (2.82), 0.50        | -5.71 (0.28), 0.00* | -4.45 (2.83), 0.26  | -2.81 (1.23), 0.15  |
| Potassium <sup>1</sup>         | -1.84 (6.36), 0.80        | -1.23 (2.53), 0.67  | -4.40 (2.88), 0.27  | -1.71 (5.19), 0.77  |
| <b>Coffee and Tea</b>          |                           |                     |                     |                     |
| Nutrient                       | Beta (SE), P              | Beta (SE), P        | Beta (SE), P        | Beta (SE), P        |
| Calcium                        | 6.42 (2.42), 0.12         | 4.67 (2.41), 0.19   | 7.22 (1.57), 0.04*  | 9.09 (1.05), 0.01*  |
| Magnesium                      | 6.52 (2.62), 0.13         | 4.64 (0.87), 0.03*  | 8.32 (1.58), 0.03*  | 6.56 (1.62), 0.06   |
| Phosphorus                     | 3.83 (2.34), 0.24         | 1.48 (3.59), 0.72   | 4.43 (2.06), 0.16   | 3.20 (1.31), 0.13   |
| Vitamin A                      | 9.46 (2.90), 0.08         | 4.29 (3.27), 0.32   | 9.77 (2.29), 0.05   | 4.96 (0.44), 0.01*  |
| Vitamin C                      | 8.52 (1.90), 0.05*        | 4.41 (2.09), 0.17   | 10.35 (1.33), 0.02* | 6.80 (0.71), 0.01*  |

Intakes of added sugars with a focus on beverages and the associations with micronutrient adequacy in US children, adolescents and teens (NHANES 2003-2018), Ricciuto, L., et al.

|                              |                    |                     |                    |                    |
|------------------------------|--------------------|---------------------|--------------------|--------------------|
| <b>Vitamin D</b>             | 2.81 (1.89), 0.27  | 1.90 (1.68), 0.38   | 0.69 (0.82), 0.49  | 1.86 (0.33), 0.03* |
| <b>Choline<sup>1</sup></b>   | -2.50 (3.50), 0.55 | -3.25 (0.19), 0.00* | -3.61 (1.54), 0.14 | -4.11 (1.44), 0.10 |
| <b>Potassium<sup>1</sup></b> | 0.44 (4.31), 0.93  | 1.29 (2.22), 0.62   | -1.95 (3.50), 0.63 | -2.92 (2.90), 0.42 |

EAR, estimated average requirement; AI, adequate intake

<sup>1</sup>>AI for choline and potassium

<sup>2</sup>Beta represents the regression coefficient (change) in percentage of the population <EAR (>AI) across quantiles of added sugars from the select beverage, testing hypothesis that regression coefficient (slope) equals 0

\*Statistically significant at p<0.05

Intakes of added sugars with a focus on beverages and the associations with micronutrient adequacy in US children, adolescents and teens (NHANES 2003-2018), Ricciuto, L., et al.

**Supplemental Table S6.** Quartiles of added sugars intake (% kcal) from the rest of the diet and trends in % <EAR (>AI<sup>1</sup>) for selected micronutrients among children, adolescents and teens from the pooled sample (NHANES 2003-2018, n=21,005); weighted n's are shown in the table.

| <b>2-8 y<br/>(n=8,599)</b>       |                                         |                                              |                                                   |                                          |                                   |
|----------------------------------|-----------------------------------------|----------------------------------------------|---------------------------------------------------|------------------------------------------|-----------------------------------|
| <b>Added Sugars<br/>(% kcal)</b> | <b>Q1<br/>n=6,974,607<br/>&lt;5.79</b>  | <b>Q2<br/>n=6,993,758<br/>5.79 to ≤8.46</b>  | <b>Q3<br/>n=6,974,352<br/>&gt;8.46 to ≤11.62</b>  | <b>Q4<br/>n=6,995,657<br/>&gt;11.62</b>  | <b>Quartile Trend<sup>2</sup></b> |
|                                  | <b>% &lt;EAR* (SE)</b>                  | <b>% &lt;EAR* (SE)</b>                       | <b>% &lt;EAR* (SE)</b>                            | <b>% &lt;EAR* (SE)</b>                   | <b>Beta (SE), P</b>               |
| <b>Calcium</b>                   | 24.96 (1.48)                            | 17.89 (1.46)                                 | 18.55 (1.91)                                      | 13.80 (1.42)                             | -3.34 (1.00), 0.08                |
| <b>Magnesium</b>                 | 1.52 (0.33)                             | 0.20 (0.12)                                  | 0.15 (0.07)                                       | 0.07 (0.04)                              | -0.46 (0.22), 0.17                |
| <b>Phosphorus</b>                | 0.21 (0.09)                             | 0.02 (0.02)                                  | 0.00 (0.00)                                       | 0.00 (0.00)                              | -0.07 (0.03), 0.17                |
| <b>Vitamin A</b>                 | 4.94 (0.81)                             | 1.35 (0.49)                                  | 1.66 (0.52)                                       | 0.44 (0.24)                              | -1.37 (0.54), 0.13                |
| <b>Vitamin C</b>                 | 0.90 (0.32)                             | 0.91 (0.30)                                  | 0.96 (0.34)                                       | 0.83 (0.31)                              | -0.02 (0.03), 0.61                |
| <b>Vitamin D</b>                 | 89.27 (1.08)                            | 89.58 (1.48)                                 | 89.59 (1.16)                                      | 87.73 (1.30)                             | -0.42 (0.35), 0.35                |
| <b>Choline<sup>1</sup></b>       | 41.75 (2.16)                            | 43.35 (2.15)                                 | 42.84 (2.14)                                      | 47.67 (2.40)                             | 1.66 (0.70), 0.14                 |
| <b>Potassium<sup>1</sup></b>     | 33.37 (1.92)                            | 38.63 (1.99)                                 | 38.67 (2.13)                                      | 48.07 (2.13)                             | 4.35 (1.18), 0.07                 |
| <b>9-18 y<br/>(n=12,406)</b>     |                                         |                                              |                                                   |                                          |                                   |
| <b>Added Sugars<br/>(% kcal)</b> | <b>Q1<br/>n=10,440,833<br/>&lt;4.78</b> | <b>Q2<br/>n=10,434,047<br/>4.78 to ≤7.57</b> | <b>Q3<br/>n=10,440,058<br/>&gt;7.57 to ≤10.87</b> | <b>Q4<br/>n=10,452,571<br/>&gt;10.87</b> | <b>Quartile Trend<sup>2</sup></b> |
|                                  | <b>% &lt;EAR (SE)</b>                   | <b>% &lt;EAR (SE)</b>                        | <b>% &lt;EAR (SE)</b>                             | <b>% &lt;EAR (SE)</b>                    | <b>Beta (SE), P</b>               |
| <b>Calcium</b>                   | 87.09 (1.50)                            | 65.71 (1.96)                                 | 59.84 (2.48)                                      | 41.42 (1.89)                             | -14.39 (2.00), 0.02§              |
| <b>Magnesium</b>                 | 82.03 (1.20)                            | 61.30 (1.47)                                 | 52.94 (1.75)                                      | 35.67 (1.76)                             | -14.84 (1.58), 0.01§              |
| <b>Phosphorus</b>                | 51.38 (2.06)                            | 24.29 (1.79)                                 | 17.37 (1.64)                                      | 7.00 (0.88)                              | -14.28 (3.12), 0.04§              |
| <b>Vitamin A</b>                 | 74.24 (1.68)                            | 39.79 (2.29)                                 | 28.47 (2.63)                                      | 11.83 (1.83)                             | -20.16 (3.45), 0.03§              |
| <b>Vitamin C</b>                 | 43.89 (2.40)                            | 32.53 (2.18)                                 | 27.58 (2.38)                                      | 20.39 (2.13)                             | -7.62 (0.90), 0.01§               |
| <b>Vitamin D</b>                 | 98.82 (0.25)                            | 96.11 (0.77)                                 | 93.85 (0.79)                                      | 89.30 (1.12)                             | -3.06 (0.34), 0.01                |
| <b>Choline<sup>1</sup></b>       | 0.98 (0.31)                             | 2.95 (0.80)                                  | 4.56 (0.94)                                       | 6.04 (1.17)                              | 1.69 (0.08), 0.00†                |
| <b>Potassium<sup>1</sup></b>     | 9.80 (1.24)                             | 25.17 (1.80)                                 | 30.83 (1.95)                                      | 50.81 (2.16)                             | 12.86 (1.77), 0.02§               |

EAR, estimated average requirement; AI, adequate intake

<sup>1</sup>>AI for choline and potassium

<sup>2</sup>From regression analysis, test for trend

†Statistically significant at p<0.01; §Statistically significant at p<0.05
